# Supplementary material for: Rapid detection of myeloid neoplasm fusions using Single Molecule Long-Read Sequencing
Source: bioRxiv or medRxiv preprint supplement (doi:10.1101/2022.06.16.22276469), 2022-06-17
Supplement: Supplementary file [file media-1.pdf]

Supplementary Table 1. Times and total reads before 3 fusion reads could be confirmed in cell lines and patient samples.

| Cell lines      | Time to 3 Fusions (min) | Reads to 3 Fusions |
|-----------------|-------------------------|--------------------|
| K562            | 51.44                   | 2598               |
| KCL22           | 18.87                   | 1321               |
| KU812           | 32.16                   | 4137               |
| ME1             | 77.65                   | 43326              |
| MV411           | 33.65                   | 7175               |
| NB4             | 831.26                  | 22803              |
| Patient samples | Time to 3 Fusions (min) | Reads to 3 Fusions |
| CML1            | 47.33                   | 2093               |
| CML2            | 653.56                  | 2869               |
| CML3            | NR                      | NR                 |
| CML4            | 145.23                  | 21201              |
| CML5            | 319.42                  | 1790               |
| CML6            | 31.74                   | 10303              |
| AML1            | 63.78                   | 17414              |
| AML2            | 193.36                  | 24999              |
| APL1            | NR                      | NR                 |
| APL2            | 98.27                   | 9106               |
| APL3            | 136.58                  | 2683               |
| APL4            | NR                      | NR                 |
| APL5            | NR                      | NR                 |
| APL6            | NR                      | NR                 |
|                 |                         |                    |

min= minutes, NR= Not reached
